# Supplementary material for: Increasing the electron donation in a dinucleating ligand family: molecular and electronic structures in a series of CoIICoII complexes
Source: Royal Society of Chemistry journal article supplement (doi:10.1039/d4dt00877d), 2024-01-01
Supplement: d4dt00877d1.pdf [file d4dt00877d1.pdf]

## Electronic Supplementary Information

for

### **Increasing the Electron Donation in a Dinucleating Ligand Family: Molecular and Electronic Structures in a Series of Co<sup>II</sup>Co<sup>II</sup> Complexes**

**Felix Depenbrock, Thomas Limpke, Anja Stammler, Jan Oldengott, Hartmut Bögge, and Thorsten Glaser\***

*Lehrstuhl für Anorganische Chemie I, Fakultät für Chemie, Universität Bielefeld, Universitätsstrasse 25, D-33615 Bielefeld, Germany*

\* *To whom correspondence should be addressed. E-mail: thorsten.glaser@uni-bielefeld.de (T.G.)*

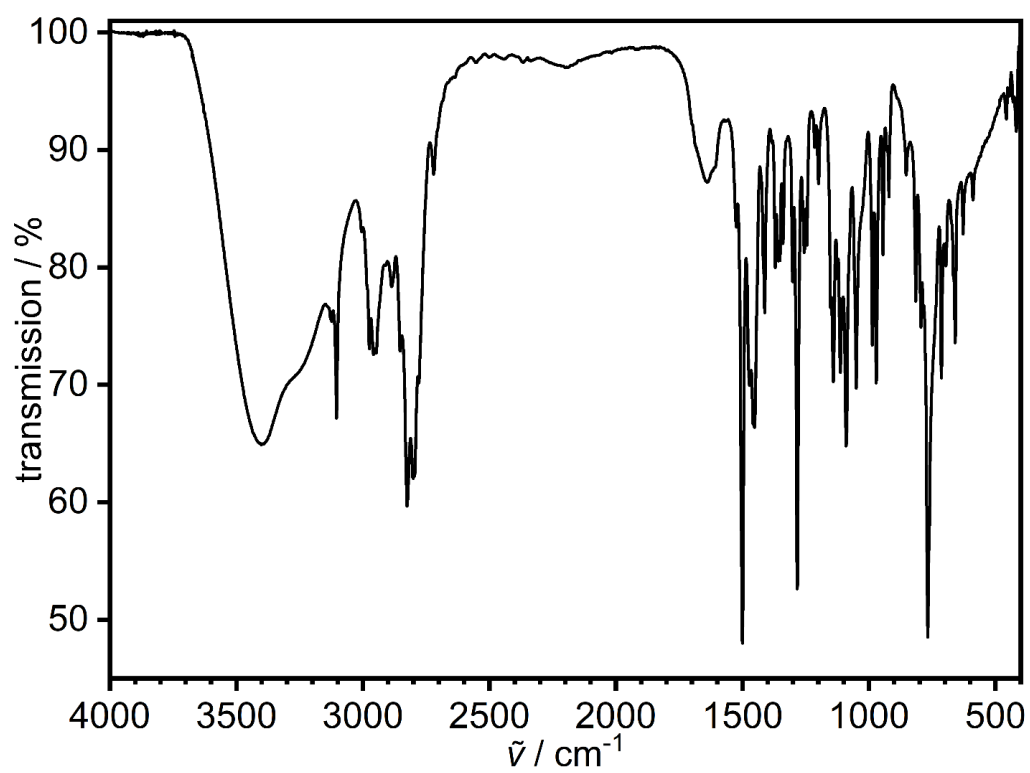

**Figure S1.** FTIR spectrum of cool.

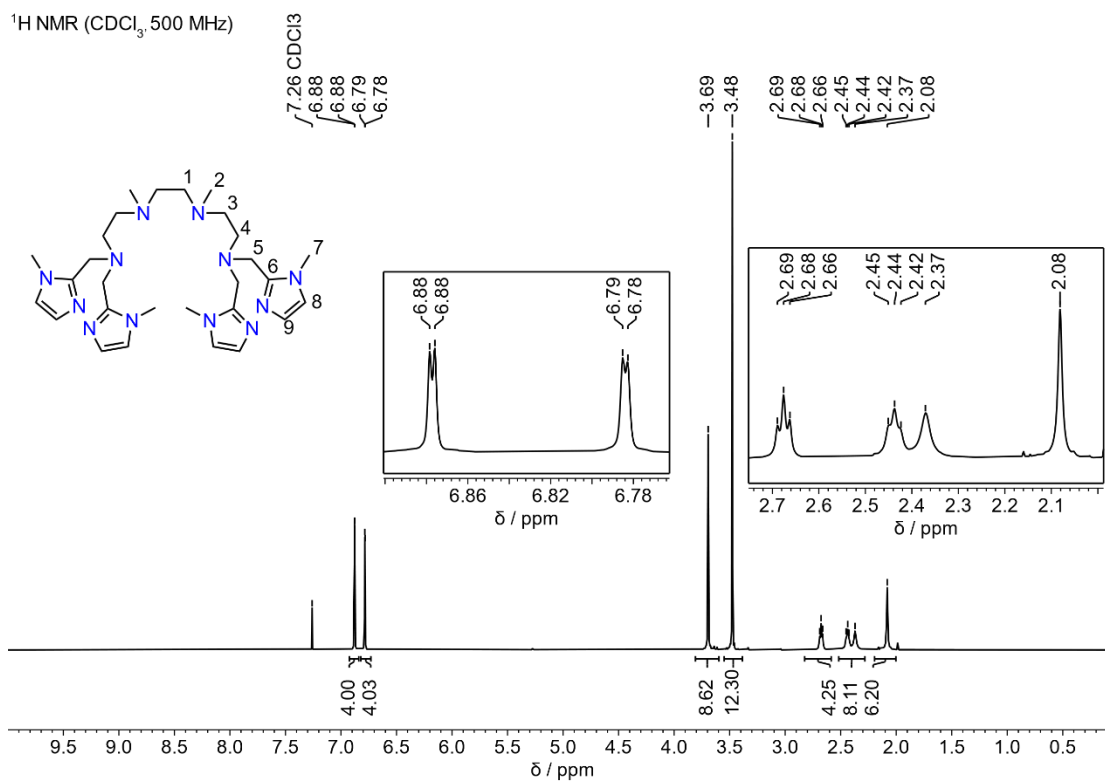

**Figure S2.** 500MHz <sup>1</sup>H NMR spectrum of cool in CDCl<sub>3</sub>.

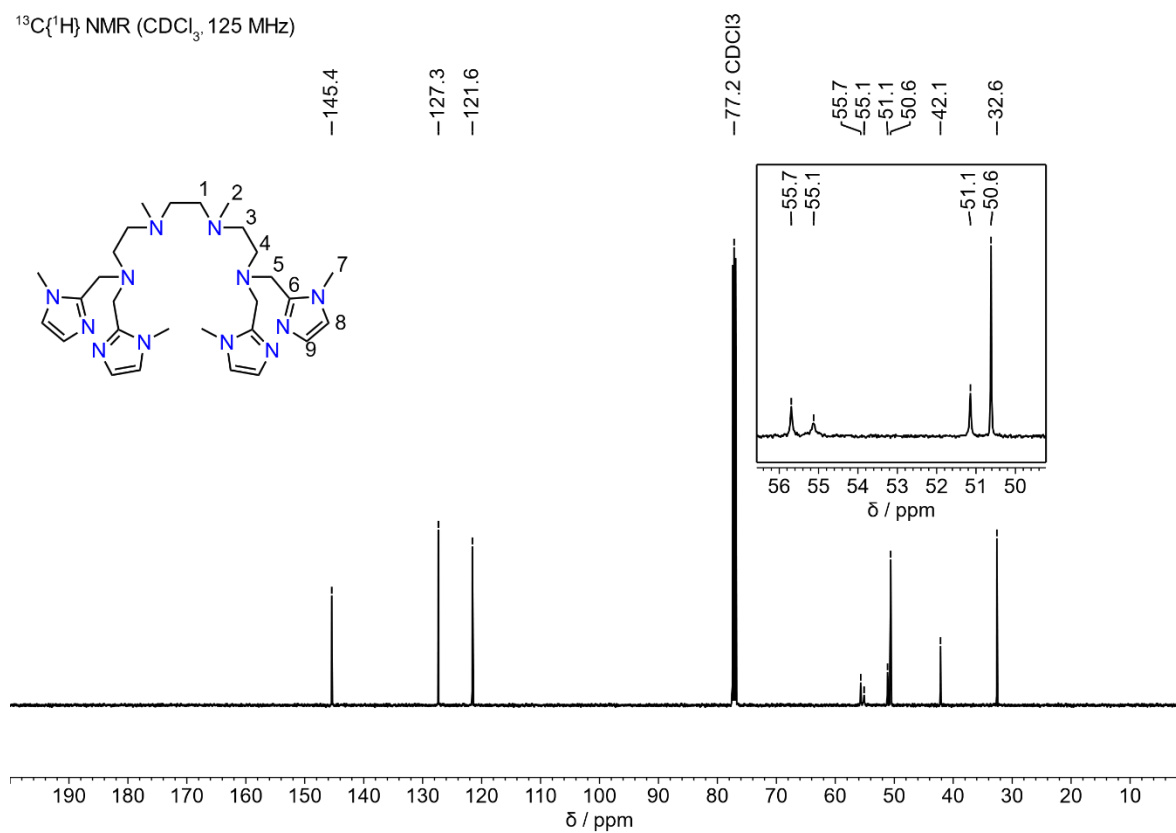

**Figure S3.** 125MHz <sup>13</sup>C{<sup>1</sup>H} NMR spectrum of cool in CDCl<sub>3</sub>.

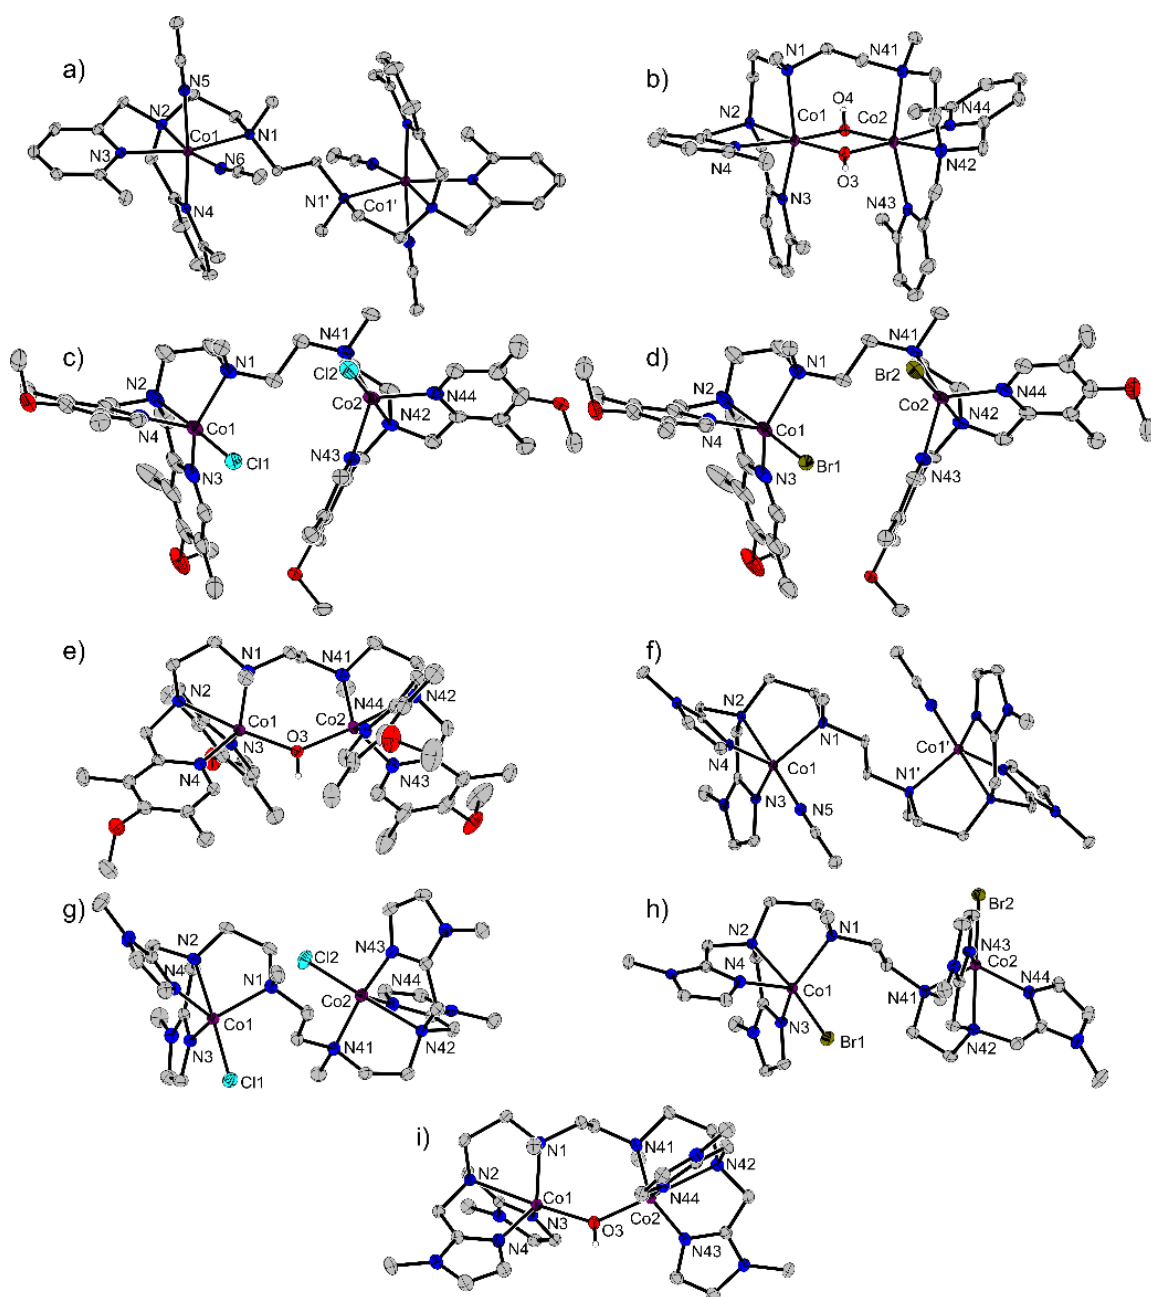

**Figure S4.** Thermal ellipsoid plots drawn at 50% probability level of a)  $[(\text{susan}^{6\text{-Me}})\{\text{Co}^{\text{II}}(\text{CH}_3\text{CN})_2\}_2]^{4+}$  in single-crystals of  $[(\text{susan}^{6\text{-Me}})\{\text{Co}^{\text{II}}(\text{CH}_3\text{CN})_2\}_2](\text{ClO}_4)_4$ , b)  $[(\text{susan}^{6\text{-Me}})\{\text{Co}^{\text{II}}(\mu\text{-OH})_2\text{Co}^{\text{II}}\}]^{2+}$  in single-crystals of  $[(\text{susan}^{6\text{-Me}})\{\text{Co}^{\text{II}}(\mu\text{-OH})_2\text{Co}^{\text{II}}\}](\text{ClO}_4)_2 \cdot \text{MeOH}$ , c)  $[(\text{susan}^{\text{OMe}})\{\text{Co}^{\text{II}}\text{Cl}_2\}]^{2+}$  in single-crystals of  $[(\text{susan}^{\text{OMe}})\{\text{Co}^{\text{II}}\text{Cl}_2\}](\text{ClO}_4)_2 \cdot 3\text{MeOH}$ , d)  $[(\text{susan}^{\text{OMe}})\{\text{Co}^{\text{II}}\text{Br}_2\}]^{2+}$  in single-crystals of  $[(\text{susan}^{\text{OMe}})\{\text{Co}^{\text{II}}\text{Br}_2\}](\text{ClO}_4)_2 \cdot 3\text{MeOH}$ , e)  $[(\text{susan}^{\text{OMe}})\text{Co}^{\text{II}}(\mu\text{-OH})\text{Co}^{\text{II}}]^{3+}$  in single-crystals of  $[(\text{susan}^{\text{OMe}})\text{Co}^{\text{II}}(\mu\text{-OH})\text{Co}^{\text{II}}](\text{ClO}_4)_3 \cdot 3\text{CH}_3\text{CN}$ , f)  $[(\text{cool})\{\text{Co}^{\text{II}}(\text{CH}_3\text{CN})_2\}_2]^{4+}$  in single-crystals of  $[(\text{cool})\{\text{Co}^{\text{II}}(\text{CH}_3\text{CN})_2\}_2](\text{ClO}_4)_4 \cdot 2\text{CH}_3\text{CN}$ , g)  $[(\text{cool})\{\text{Co}^{\text{II}}\text{Cl}_2\}]^{2+}$  in single-crystals of  $[(\text{cool})\{\text{Co}^{\text{II}}\text{Cl}_2\}](\text{ClO}_4)_2$ , h)  $[(\text{cool})\{\text{Co}^{\text{II}}\text{Br}_2\}]^{2+}$  in single-crystals of  $[(\text{cool})\{\text{Co}^{\text{II}}\text{Br}_2\}](\text{ClO}_4)_2$ , and i)  $[(\text{cool})\text{Co}^{\text{II}}(\mu\text{-OH})\text{Co}^{\text{II}}]^{3+}$  in single-crystals of  $[(\text{cool})\text{Co}^{\text{II}}(\mu\text{-OH})\text{Co}^{\text{II}}](\text{BPh}_4)_2(\text{CF}_3\text{SO}_3) \cdot 2\text{CH}_3\text{CN}$ . Hydrogen atoms, counter ions and solvent molecules are omitted for clarity.

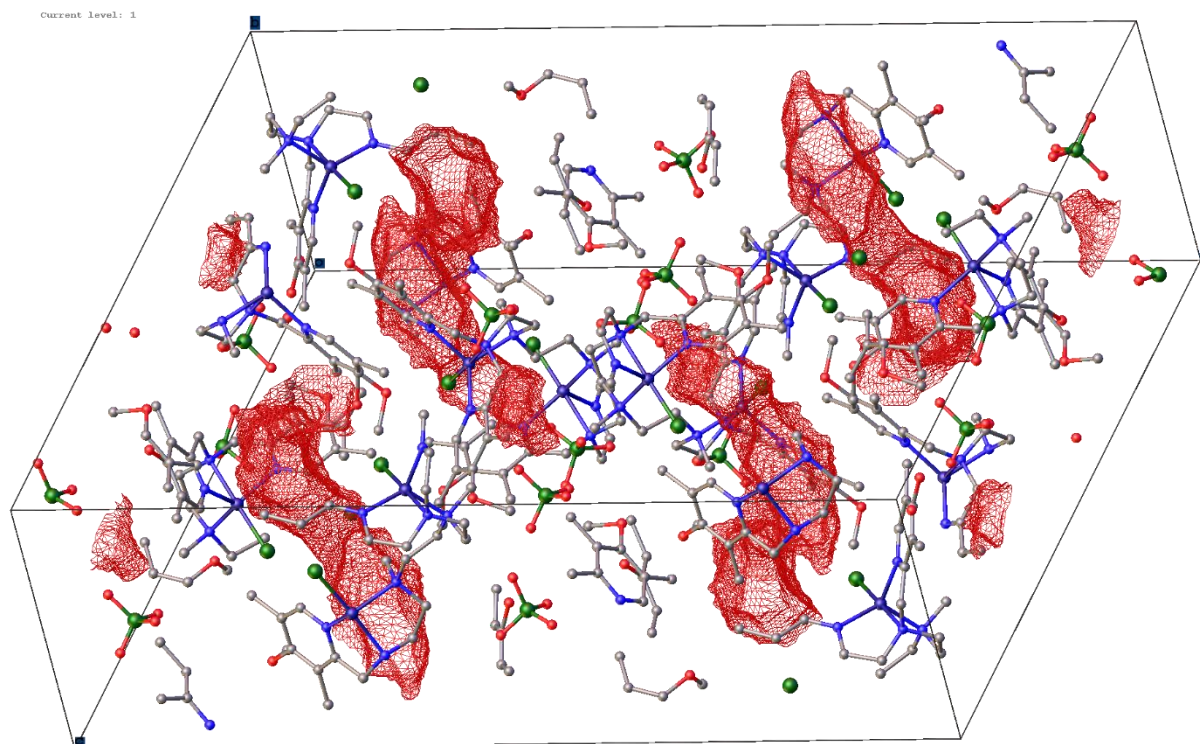

**Figure S5.** Calculated voids 0.1 Å from van der Waals surface in the unit cell of  $[(\text{susan}^{\text{OMe}})\{\text{CoCl}\}_2](\text{ClO}_4)_2 \cdot 3\text{MeOH}$ . The channels are oriented along the  $2_1$  screw axis, i.e. parallel to the crystallographic  $b$ -axis. Hydrogen atoms were omitted for clarity.

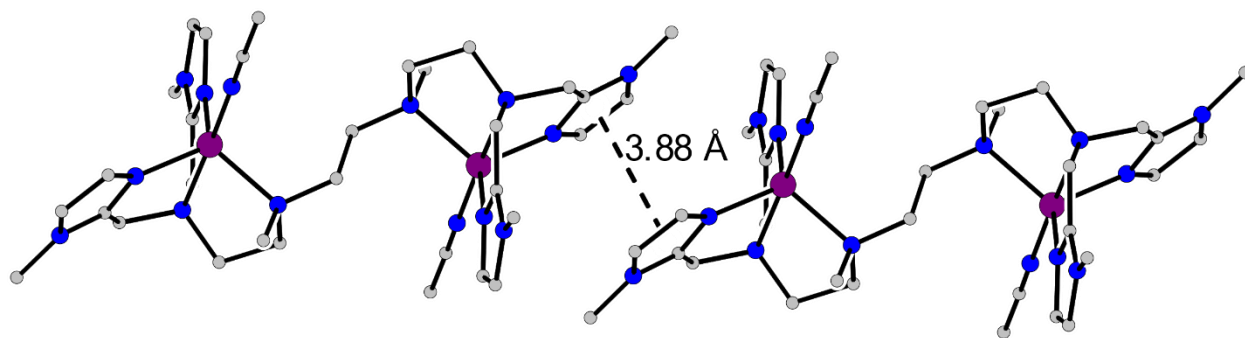

**Figure S6.** Intermolecular  $\pi$ - $\pi$  interaction between two neighboring imidazoles in single crystals of  $[(\text{cool})\{\text{Co}^{\text{II}}(\text{CH}_3\text{CN})\}_2](\text{ClO}_4)_4 \cdot 2\text{CH}_3\text{CN}$ . Hydrogen atoms, counter ions and solvent molecules are omitted for clarity.

**Table S1.** Crystal data and refinement parameters.

|                                                                                      | [(susan <sup>6-Me</sup> ){Co <sup>II</sup> (CH <sub>3</sub> CN) <sub>2</sub> }] <sub>2</sub> (ClO <sub>4</sub> ) <sub>4</sub> | [(susan <sup>6-Me</sup> ){Co <sup>II</sup> (μ-OH) <sub>2</sub> Co <sup>II</sup> }] <sub>2</sub> (ClO <sub>4</sub> ) <sub>2</sub> •MeOH | [(susan <sup>OMe</sup> ){Co <sup>II</sup> Cl <sub>2</sub> }] <sub>2</sub> (ClO <sub>4</sub> ) <sub>2</sub> •3MeOH | [(susan <sup>OMe</sup> ){Co <sup>II</sup> Br <sub>2</sub> }] <sub>2</sub> (ClO <sub>4</sub> ) <sub>2</sub> •3MeOH | [(susan <sup>OMe</sup> ){Co <sup>II</sup> (μ-OH)Co <sup>II</sup> }] <sub>2</sub> (ClO <sub>4</sub> ) <sub>3</sub> •3CH <sub>3</sub> CN |
|--------------------------------------------------------------------------------------|-------------------------------------------------------------------------------------------------------------------------------|----------------------------------------------------------------------------------------------------------------------------------------|-------------------------------------------------------------------------------------------------------------------|-------------------------------------------------------------------------------------------------------------------|----------------------------------------------------------------------------------------------------------------------------------------|
| Empirical formula                                                                    | C <sub>44</sub> H <sub>62</sub> Cl <sub>4</sub> Co <sub>2</sub> N <sub>12</sub> O <sub>16</sub>                               | C <sub>37</sub> H <sub>56</sub> Cl <sub>2</sub> Co <sub>2</sub> N <sub>8</sub> O <sub>11</sub>                                         | C <sub>47</sub> H <sub>78</sub> Cl <sub>4</sub> Co <sub>2</sub> N <sub>8</sub> O <sub>15</sub>                    | C <sub>47</sub> H <sub>78</sub> Br <sub>2</sub> Cl <sub>2</sub> Co <sub>2</sub> N <sub>8</sub> O <sub>15</sub>    | C <sub>50</sub> H <sub>76</sub> Cl <sub>3</sub> Co <sub>2</sub> H <sub>76</sub> N <sub>11</sub> O <sub>17</sub>                        |
| Formula weight                                                                       | 1274.71                                                                                                                       | 977.65                                                                                                                                 | 1254.83                                                                                                           | 1343.75                                                                                                           | 1327.42                                                                                                                                |
| Crystal system                                                                       | triclinic                                                                                                                     | monoclinic                                                                                                                             | monoclinic                                                                                                        | monoclinic                                                                                                        | monoclinic                                                                                                                             |
| Space group                                                                          | <i>P</i> $\bar{1}$                                                                                                            | <i>P</i> 2 <sub>1</sub> / <i>c</i>                                                                                                     | <i>C</i> 2/ <i>c</i>                                                                                              | <i>C</i> 2/ <i>c</i>                                                                                              | <i>P</i> 2 <sub>1</sub> / <i>c</i>                                                                                                     |
| <i>a</i> [Å]                                                                         | 11.4940(6)                                                                                                                    | 10.0649(2)                                                                                                                             | 34.6570(13)                                                                                                       | 34.7597(14)                                                                                                       | 12.1162(16)                                                                                                                            |
| <i>b</i> [Å]                                                                         | 11.7996(7)                                                                                                                    | 32.2086(5)                                                                                                                             | 14.4542(9)                                                                                                        | 14.4732(6)                                                                                                        | 38.977(5)                                                                                                                              |
| <i>c</i> [Å]                                                                         | 12.1256(7)                                                                                                                    | 13.7980(2)                                                                                                                             | 24.3699(13)                                                                                                       | 24.5591(8)                                                                                                        | 12.8849(16)                                                                                                                            |
| $\alpha$ [°]                                                                         | 70.583(2)                                                                                                                     | 90                                                                                                                                     | 90                                                                                                                | 90                                                                                                                | 90                                                                                                                                     |
| $\beta$ [°]                                                                          | 64.862(2)                                                                                                                     | 110.8920(10)                                                                                                                           | 105.2390(10)                                                                                                      | 106.4700(10)                                                                                                      | 93.902(2)                                                                                                                              |
| $\gamma$ [°]                                                                         | 67.714(2)                                                                                                                     | 90                                                                                                                                     | 90                                                                                                                | 90                                                                                                                | 90                                                                                                                                     |
| <i>V</i> [Å <sup>3</sup> ]                                                           | 1348.44(14)                                                                                                                   | 4178.90(12)                                                                                                                            | 11778.6(11)                                                                                                       | 11848.3(8)                                                                                                        | 6070.8(13)                                                                                                                             |
| <i>Z</i>                                                                             | 1                                                                                                                             | 4                                                                                                                                      | 8                                                                                                                 | 8                                                                                                                 | 4                                                                                                                                      |
| $\rho$ [g cm <sup>-3</sup> ]                                                         | 1.570                                                                                                                         | 1.554                                                                                                                                  | 1.415                                                                                                             | 1.507                                                                                                             | 1.452                                                                                                                                  |
| $\mu$ [mm <sup>-1</sup> ]                                                            | 7.319                                                                                                                         | 7.980                                                                                                                                  | 0.813                                                                                                             | 2.067                                                                                                             | 0.754                                                                                                                                  |
| <i>F</i> (000)                                                                       | 660.0                                                                                                                         | 2040.0                                                                                                                                 | 5264.0                                                                                                            | 5552.0                                                                                                            | 2776.0                                                                                                                                 |
| Crystal size [mm <sup>3</sup> ]                                                      | 0.17 × 0.13 × 0.07                                                                                                            | 0.36 × 0.08 × 0.04                                                                                                                     | 0.25 × 0.18 × 0.14                                                                                                | 0.31 × 0.26 × 0.08                                                                                                | 0.46 × 0.22 × 0.05                                                                                                                     |
| Radiation                                                                            | CuK $\alpha$ ( $\lambda$ = 1.54178Å)                                                                                          | CuK $\alpha$ ( $\lambda$ = 1.54178Å)                                                                                                   | MoK $\alpha$ ( $\lambda$ = 0.71073 Å)                                                                             | MoK $\alpha$ ( $\lambda$ = 0.71073 Å)                                                                             | MoK $\alpha$ ( $\lambda$ = 0.71073 Å)                                                                                                  |
| 2 $\theta$ range [°]                                                                 | 8.23 to 136.71°                                                                                                               | 5.49 to 137.09°                                                                                                                        | 3.36 to 52.04                                                                                                     | 3.07 to 60.07                                                                                                     | 3.34 to 60.19                                                                                                                          |
| <i>hkl</i> ranges                                                                    | -13 ≤ <i>h</i> ≤ 12<br>-14 ≤ <i>k</i> ≤ 14<br>-14 ≤ <i>l</i> ≤ 14                                                             | -12 ≤ <i>h</i> ≤ 12<br>-38 ≤ <i>k</i> ≤ 38<br>-16 ≤ <i>l</i> ≤ 16                                                                      | -42 ≤ <i>h</i> ≤ 42<br>-17 ≤ <i>k</i> ≤ 17<br>-29 ≤ <i>l</i> ≤ 30                                                 | -48 ≤ <i>h</i> ≤ 48<br>-20 ≤ <i>k</i> ≤ 20<br>-34 ≤ <i>l</i> ≤ 34                                                 | -17 ≤ <i>h</i> ≤ 17<br>-54 ≤ <i>k</i> ≤ 54<br>-18 ≤ <i>l</i> ≤ 18                                                                      |
| Collected refl.                                                                      | 36906                                                                                                                         | 31286                                                                                                                                  | 63771                                                                                                             | 131671                                                                                                            | 114260                                                                                                                                 |
| Unique refl., <i>R</i> <sub>int</sub>                                                | 4933, 0.0307                                                                                                                  | 7669, 0.0415                                                                                                                           | 11596, 0.0527                                                                                                     | 17357, 0.0444                                                                                                     | 17790, 0.0529                                                                                                                          |
| Observed refl. ( <i>I</i> > 2 $\sigma$ ( <i>I</i> ))                                 | 4854                                                                                                                          | 6684                                                                                                                                   | 8513                                                                                                              | 13535                                                                                                             | 13451                                                                                                                                  |
| Completeness                                                                         | 0.994                                                                                                                         | 0.997                                                                                                                                  | 1.000                                                                                                             | 1.000                                                                                                             | 0.997                                                                                                                                  |
| Data/restraints/param.                                                               | 4933/0/357                                                                                                                    | 7669/2/557                                                                                                                             | 11596/168/721                                                                                                     | 17357/234/721                                                                                                     | 17790/211/778                                                                                                                          |
| Goodness-of-fit on <i>F</i> <sup>2</sup>                                             | 1.047                                                                                                                         | 1.036                                                                                                                                  | 1.031                                                                                                             | 1.017                                                                                                             | 1.012                                                                                                                                  |
| <i>R</i> <sub>1</sub> , <i>wR</i> <sub>2</sub> ( <i>I</i> > 2 $\sigma$ ( <i>I</i> )) | 0.0278, 0.0723                                                                                                                | 0.0401, 0.0977                                                                                                                         | 0.0378, 0.0862                                                                                                    | 0.0391, 0.0838                                                                                                    | 0.0403, 0.0875                                                                                                                         |
| <i>R</i> <sub>1</sub> , <i>wR</i> <sub>2</sub> (all data)                            | 0.0282, 0.0725                                                                                                                | 0.0489, 0.1023                                                                                                                         | 0.0602, 0.0953                                                                                                    | 0.0561, 0.0905                                                                                                    | 0.0619, 0.0951                                                                                                                         |
| Largest peak/hole [e Å <sup>-3</sup> ]                                               | 0.74/-0.38                                                                                                                    | 0.64/-0.52                                                                                                                             | 0.58/-0.51                                                                                                        | 0.84/-0.61                                                                                                        | 0.59/-0.54                                                                                                                             |
| CCDC numbers                                                                         | 2341023                                                                                                                       | 2341024                                                                                                                                | 2341025                                                                                                           | 2341026                                                                                                           | 2341027                                                                                                                                |

## Continuation of Table S1.

|                                        | $[(\text{cool})\{\text{Co}^{\text{II}}(\text{CH}_3\text{CN})\}_2](\text{ClO}_4)_4 \cdot 2\text{CH}_3\text{CN}$ | $[(\text{cool})\{\text{Co}^{\text{II}}\text{Cl}\}_2](\text{ClO}_4)_2$     | $[(\text{cool})\{\text{Co}^{\text{II}}\text{Br}\}_2](\text{ClO}_4)_2$                | $[(\text{cool})\{\text{Co}^{\text{II}}(\mu\text{-OH})\text{Co}^{\text{II}}\}(\text{BPh}_4)_2(\text{CF}_3\text{SO}_3) \cdot 2\text{CH}_3\text{CN}$ |
|----------------------------------------|----------------------------------------------------------------------------------------------------------------|---------------------------------------------------------------------------|--------------------------------------------------------------------------------------|---------------------------------------------------------------------------------------------------------------------------------------------------|
| Empirical formula                      | $\text{C}_{36}\text{H}_{58}\text{N}_{16}\text{O}_{16}\text{Cl}_4\text{Co}_2$                                   | $\text{C}_{28}\text{H}_{46}\text{Cl}_4\text{Co}_2\text{N}_{12}\text{O}_8$ | $\text{C}_{28}\text{H}_{46}\text{Br}_2\text{Cl}_2\text{Co}_2\text{N}_{12}\text{O}_8$ | $\text{C}_{81}\text{H}_{93}\text{B}_2\text{Co}_2\text{F}_3\text{N}_{14}\text{O}_4\text{S}$                                                        |
| Formula weight                         | 1230.64                                                                                                        | 938.43                                                                    | 1027.35                                                                              | 1555.23                                                                                                                                           |
| Crystal system                         | monoclinic                                                                                                     | orthorhombic                                                              | orthorhombic                                                                         | triclinic                                                                                                                                         |
| Space group                            | $P2_1/n$                                                                                                       | $P2_12_12_1$                                                              | $P2_12_12_1$                                                                         | $P\bar{1}$                                                                                                                                        |
| $a$ [Å]                                | 11.730(3)                                                                                                      | 12.505(2)                                                                 | 12.4043(6)                                                                           | 13.3763(5)                                                                                                                                        |
| $b$ [Å]                                | 17.852(4)                                                                                                      | 12.7850(19)                                                               | 13.0584(7)                                                                           | 15.5871(7)                                                                                                                                        |
| $c$ [Å]                                | 13.124(4)                                                                                                      | 24.509(4)                                                                 | 24.6003(11)                                                                          | 19.1171(8)                                                                                                                                        |
| $\alpha$ [°]                           | 90                                                                                                             | 90                                                                        | 90                                                                                   | 90.4780(10)                                                                                                                                       |
| $\beta$ [°]                            | 112.367(15)                                                                                                    | 90                                                                        | 90                                                                                   | 94.2380(10)                                                                                                                                       |
| $\gamma$ [°]                           | 90                                                                                                             | 90                                                                        | 90                                                                                   | 105.7960(10)                                                                                                                                      |
| $V$ [Å <sup>3</sup> ]                  | 2541.6(12)                                                                                                     | 3918.4(11)                                                                | 3984.8(3)                                                                            | 3823.2(3)                                                                                                                                         |
| $Z$                                    | 2                                                                                                              | 4                                                                         | 4                                                                                    | 2                                                                                                                                                 |
| $\rho$ [g cm <sup>-3</sup> ]           | 1.608                                                                                                          | 1.591                                                                     | 1.712                                                                                | 1.351                                                                                                                                             |
| $\mu$ [mm <sup>-1</sup> ]              | 0.946                                                                                                          | 1.182                                                                     | 3.034                                                                                | 0.529                                                                                                                                             |
| $F(000)$                               | 1272.0                                                                                                         | 1936.0                                                                    | 2080.0                                                                               | 1632.0                                                                                                                                            |
| Crystal size [mm <sup>3</sup> ]        | 0.09 × 0.09 × 0.07                                                                                             | 0.19 × 0.18 × 0.04                                                        | 0.39 × 0.22 × 0.18                                                                   | 0.50 × 0.25 × 0.08                                                                                                                                |
| Radiation                              | MoK $\alpha$ ( $\lambda = 0.71073$ Å)                                                                          | MoK $\alpha$ ( $\lambda = 0.71073$ Å)                                     | MoK $\alpha$ ( $\lambda = 0.71073$ Å)                                                | MoK $\alpha$ ( $\lambda = 0.71073$ Å)                                                                                                             |
| $2\theta$ range [°]                    | 5.67 to 54.00                                                                                                  | 3.32 to 60.21                                                             | 3.53 to 65.90                                                                        | 2.72 to 60.39                                                                                                                                     |
| $hkl$ ranges                           | -14 ≤ $h$ ≤ 14<br>-22 ≤ $k$ ≤ 22<br>-16 ≤ $l$ ≤ 16                                                             | -17 ≤ $h$ ≤ 17<br>-18 ≤ $k$ ≤ 17<br>-34 ≤ $l$ ≤ 34                        | -18 ≤ $h$ ≤ 18<br>-19 ≤ $k$ ≤ 19<br>-32 ≤ $l$ ≤ 37                                   | -18 ≤ $h$ ≤ 18<br>-21 ≤ $k$ ≤ 22<br>-26 ≤ $l$ ≤ 27                                                                                                |
| Collected refl.                        | 48437                                                                                                          | 72831                                                                     | 246620                                                                               | 237268                                                                                                                                            |
| Unique refl., $R_{\text{int}}$         | 5538, 0.0720                                                                                                   | 11494, 0.0434                                                             | 14231, 0.0319                                                                        | 22561, 0.0387                                                                                                                                     |
| Observed refl. ( $I > 2\sigma(I)$ )    | 4105                                                                                                           | 10423                                                                     | 13612                                                                                | 18521                                                                                                                                             |
| Completeness                           | 0.999                                                                                                          | 0.997                                                                     | 0.971                                                                                | 0.995                                                                                                                                             |
| Data/restraints/param.                 | 5538/0/339                                                                                                     | 11494/93/521                                                              | 14231/21/521                                                                         | 22561/1/1019                                                                                                                                      |
| Goodness-of-fit on $F^2$               | 1.007                                                                                                          | 1.027                                                                     | 1.029                                                                                | 1.018                                                                                                                                             |
| $R_1, wR_2$ ( $I > 2\sigma(I)$ )       | 0.0393, 0.0799                                                                                                 | 0.0330, 0.0791                                                            | 0.0211, 0.0508                                                                       | 0.0356, 0.0894                                                                                                                                    |
| $R_1, wR_2$ (all data)                 | 0.0661, 0.0904                                                                                                 | 0.0392, 0.0822                                                            | 0.0231, 0.0515                                                                       | 0.0479, 0.0970                                                                                                                                    |
| Largest peak/hole [e Å <sup>-3</sup> ] | 0.96/-0.74                                                                                                     | 0.73/-0.41                                                                | 0.77/-0.39                                                                           | 0.57/-0.36                                                                                                                                        |
| Flack parameter                        |                                                                                                                | -0.008(4)                                                                 | -0.0069(10)                                                                          |                                                                                                                                                   |
| CCDC numbers                           | 2341028                                                                                                        | 2341029                                                                   | 2341030                                                                              | 2341031                                                                                                                                           |
